# Supplementary material for: Temperature-Dependent Activity of Gold Nanocatalysts Supported on Activated Carbon in Redox Catalytic Reactions: 5-Hydroxymethylfurfural Oxidation and 4-Nitrophenol Reduction Comparison
Source: MDPI journal article supplement (doi:10.3390/catal12030323), 2022-03-11
Supplement: s1 [file s1]

## -Supplementary material-

### Temperature-dependent activity of gold nano-catalysts supported on activated carbon in redox catalytic reactions: 5-hydroxymethylfurfural oxidation and 4-nitrophenol reduction comparison

Stefano Scurti<sup>1,3</sup>, Alessandro Allegri<sup>1,3</sup>, Francesca Liuzzi<sup>1,3</sup>, Elena Rodríguez-Aguado<sup>2</sup>, Juan Antonio Cecilia<sup>2</sup>, Stefania Albonetti<sup>1,3\*</sup>, Daniele Caretti<sup>1,3\*</sup>, Nikolaos Dimitratos<sup>1,3\*</sup>

<sup>1</sup>Industrial Chemistry “Toso Montanari” Department, University of Bologna, Viale Risorgimento 4, 40136 Bologna, Italy

<sup>2</sup>Departamento de Química Inorgánica, Cristalografía y Mineralogía (Unidad Asociada al ICP-CSIC), Facultad de Ciencias, Universidad de Málaga, Campus de Teatinos, 29071 Málaga, Spain

<sup>3</sup>Center for Chemical Catalysis - C<sup>3</sup>, Alma Mater Studiorum Università di Bologna, Viale Risorgimento 4, 40136 Bologna, Italy

### X-ray photoelectron spectroscopy (XPS)

a)

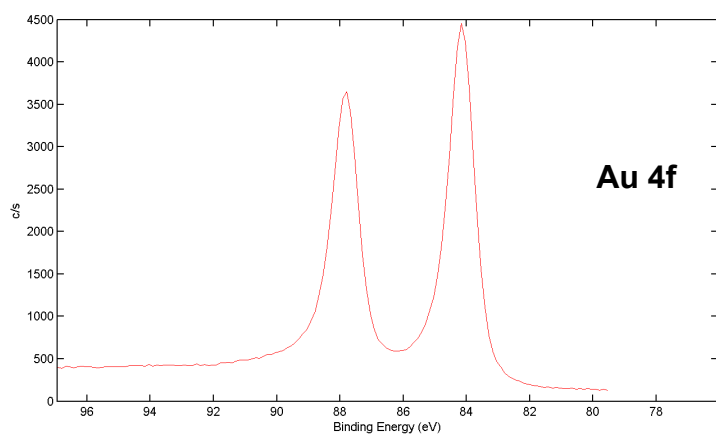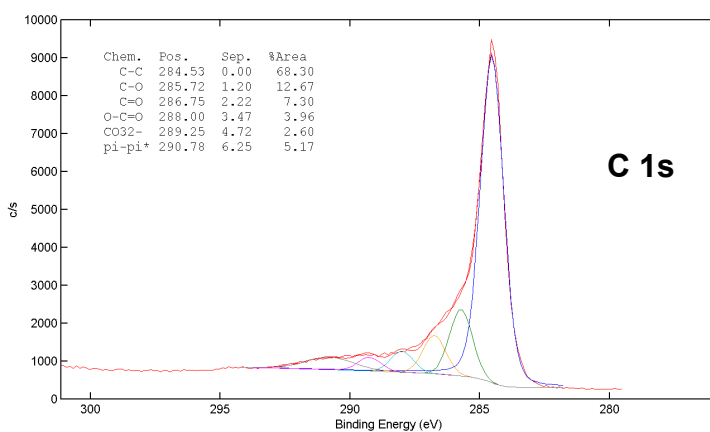

b)

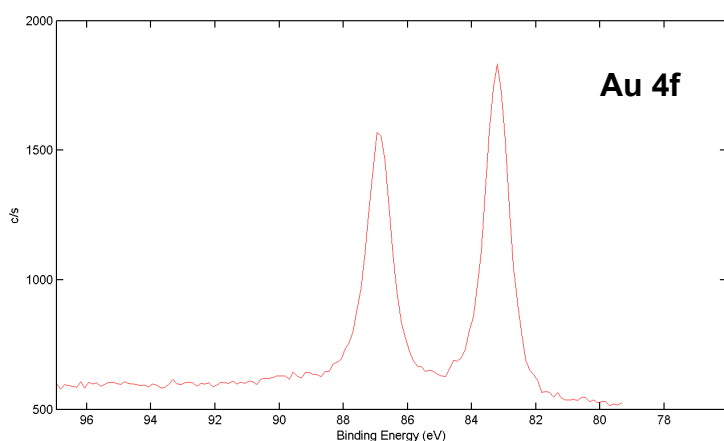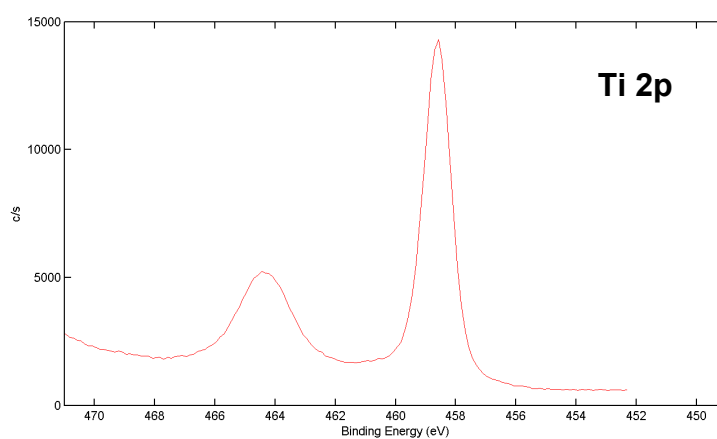

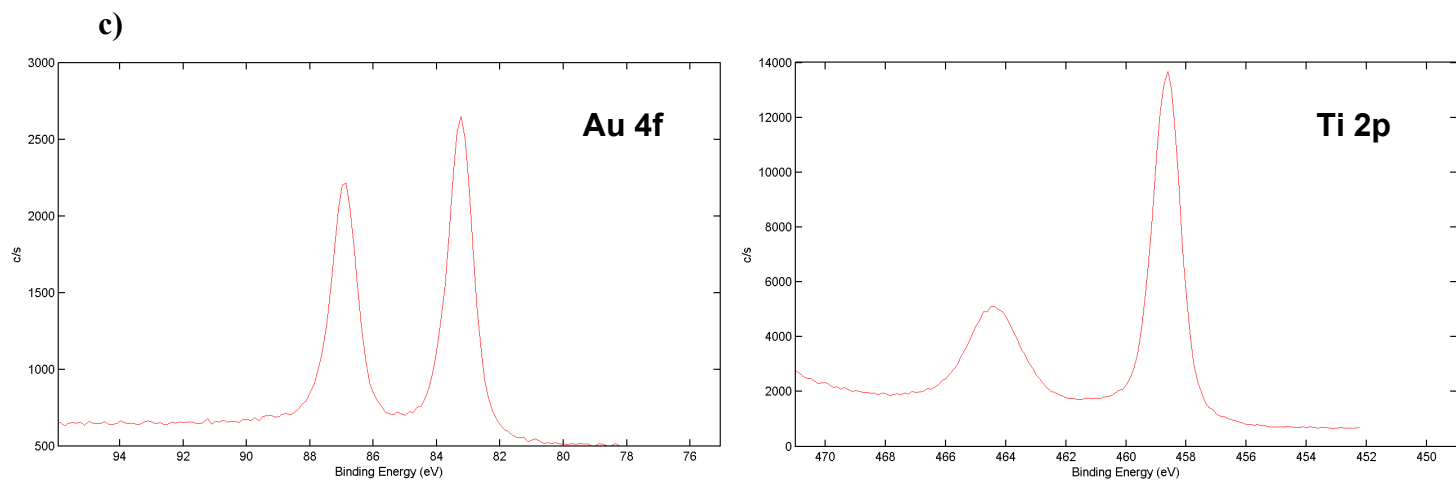

**Figure S1.** XPS spectra for Au/AC\_PVA-99-washed (a), Au/TiO<sub>2</sub>\_PVA-99 (b) and Au/TiO<sub>2</sub>\_PVA-99-washed (c).

## Transmission Electron Microscopy

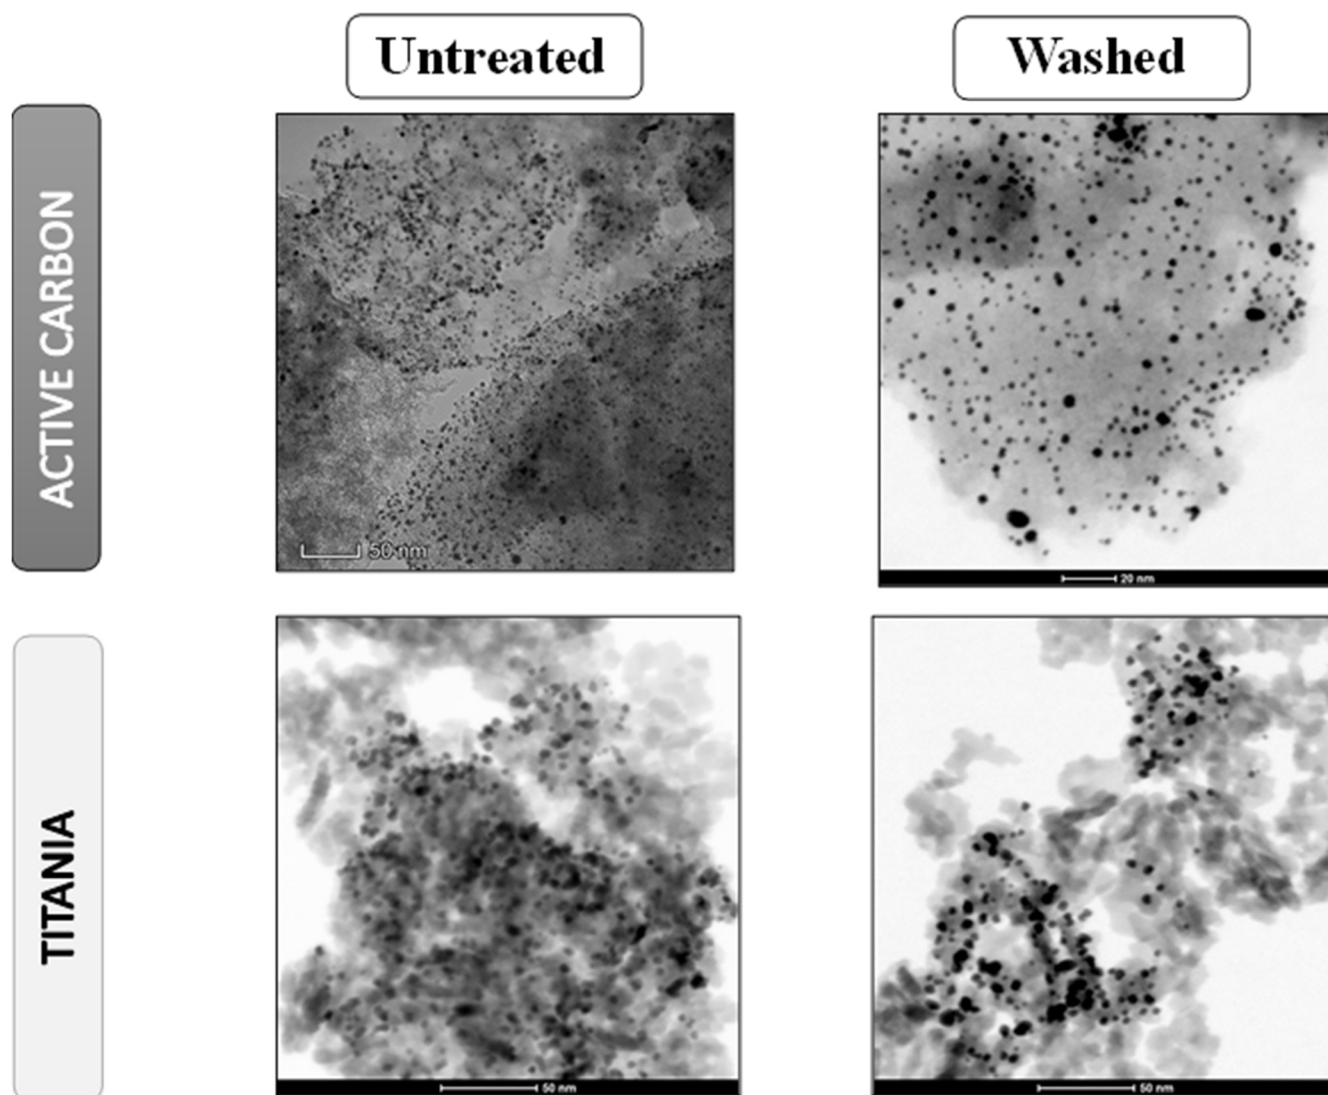

**Figure S2.** TEM images of treated and untreated catalysts supported on active carbon and titania.

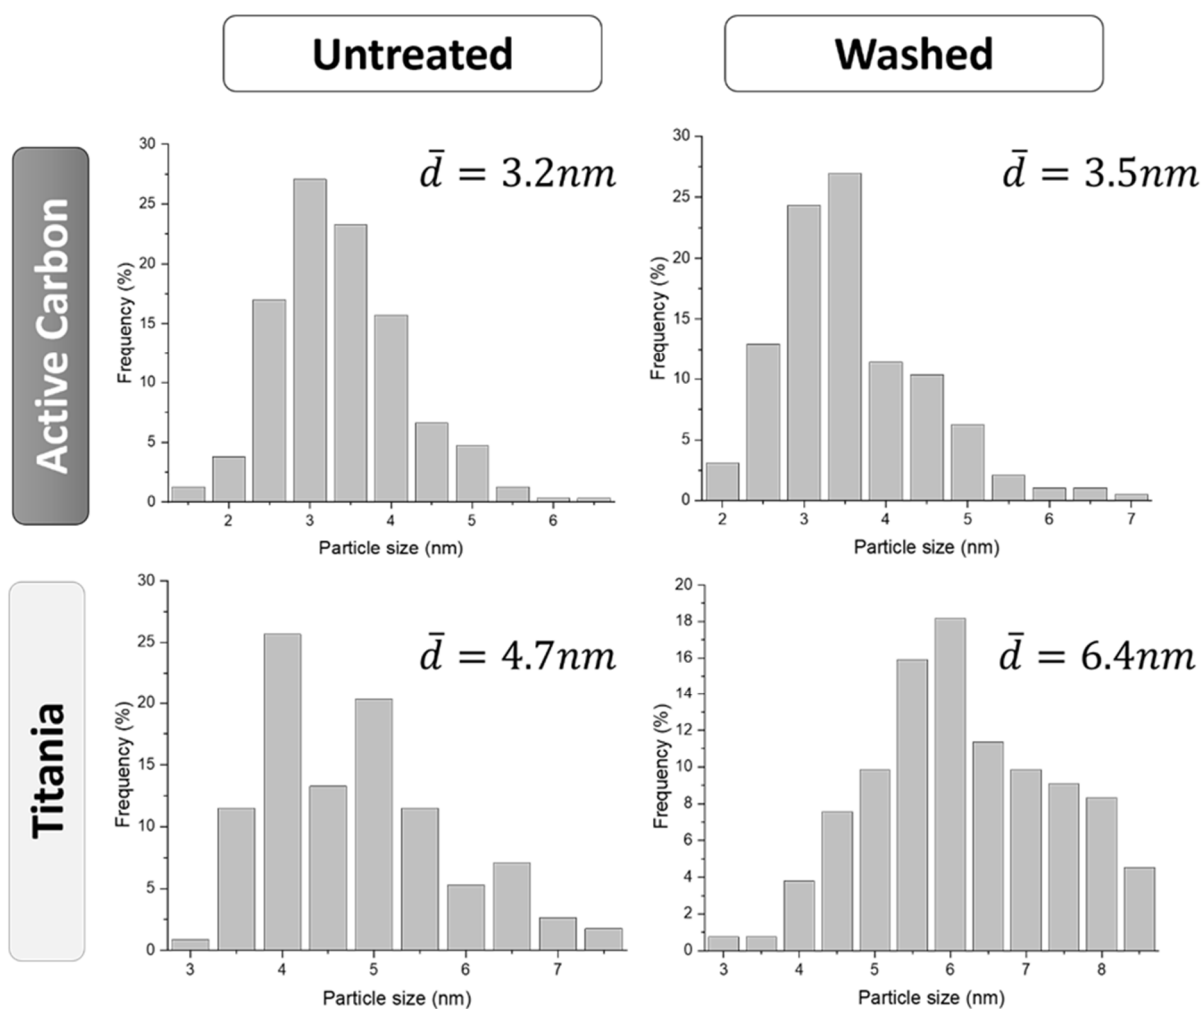

**Figure S3.** Particles size distribution of treated and untreated catalysts supported on active carbon and titania.

**Table S1.** Catalytic results on the HMF oxidation reaction.

Reaction conditions: T=70 °C, t=4h, P=10 bar O<sub>2</sub>, molar ratios HMF: Au: NaOH=1:0.01:4.

| Sample       | PVA HD (%) | X HMF (%) | S HMFCA (%) | S FFCA (%) | S FDCA (%) |
|--------------|------------|-----------|-------------|------------|------------|
| Au/AC_PVA-20 | 20         | 100       | 48          | 1          | 51         |
| Au/AC_PVA-40 | 40         | 100       | 29          | 0          | 71         |
| Au/AC_PVA-50 | 50         | 100       | 20          | 0          | 80         |
| Au/AC_PVA-60 | 60         | 100       | 25          | 0          | 75         |
| Au/AC_PVA-88 | 88         | 100       | 32          | 0          | 68         |
| Au/AC_PVA-99 | 99         | 100       | 31          | 0          | 69         |

**Table S2.** Kinetic parameters (apparent rate constant and conversion) for the 4-nitrophenol reduction related to catalysts prepared using PVA with different hydrolysis degree.

| Sample       | PVA (%) | HD | TEM Ø (nm) | Surface (at%) | Au | k <sub>app</sub> (min <sup>-1</sup> )   | X%     |
|--------------|---------|----|------------|---------------|----|-----------------------------------------|--------|
| Au/AC_PVA-20 | 20      |    | 9.6        | 0.86          |    | $1.4 \cdot 10^{-3} \pm 2 \cdot 10^{-4}$ | 14±1   |
| Au/AC_PVA-40 | 40      |    | 4.3        | 1.33          |    | $6.3 \cdot 10^{-2} \pm 9 \cdot 10^{-3}$ | 97±1   |
| Au/AC_PVA-50 | 50      |    | 4.2        | 1.72          |    | $0.1 \pm 4 \cdot 10^{-3}$               | 99±0.4 |
| Au/AC_PVA-60 | 60      |    | 3.9        | 3.34          |    | $0.2 \pm 4 \cdot 10^{-2}$               | 99±1   |
| Au/AC_PVA-88 | 88      |    | 3.4        | 2.04          |    | $7.9 \cdot 10^{-2} \pm 1 \cdot 10^{-3}$ | 97±1   |
| Au/AC_PVA-99 | 99      |    | 3.2        | 1.47          |    | $1.8 \cdot 10^{-3} \pm 4 \cdot 10^{-4}$ | 16±0.2 |
